# Supplementary material
Source: PubMed Central journal article supplement (PMC3617373)
Supplement: mmc1.pdf [file mmc1.pdf]

The American Journal of Human Genetics, Volume 92  
Supplemental Data

**Mosaicism of UDP-Galactose Transporter *SLC35A2*  
Causes a Congenital Disorder of Glycosylation**

**Bobby G. Ng, Kati J. Buckingham, Kimiyo Raymond, Martin Kircher, Emily H. Turner,  
Miao He, Joshua D. Smith, Alexey Eroshkin, Marta Szybowska, Marie Estelle Losfeld,  
Jessica X. Chong, Mariya Kozenko, Chumei Li, Marc C. Patterson, Rodney D. Gilbert,  
Deborah A. Nickerson, Jay Shendure, Michael J. Bamshad, University of Washington  
Center for Mendelian Genomics, and Hudson H. Freeze**

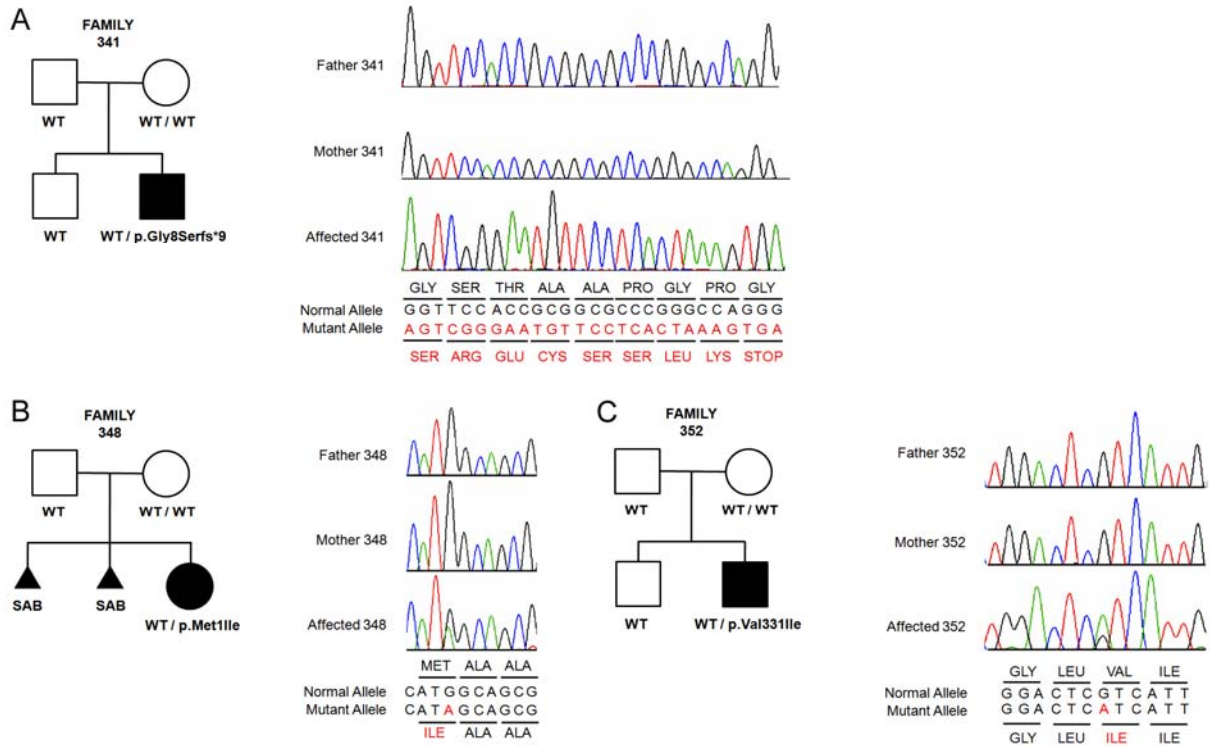

Figure S1. Confirmation of De Novo Mutations in *SLC35A2* by Sanger Sequencing within Each Familial Pedigree

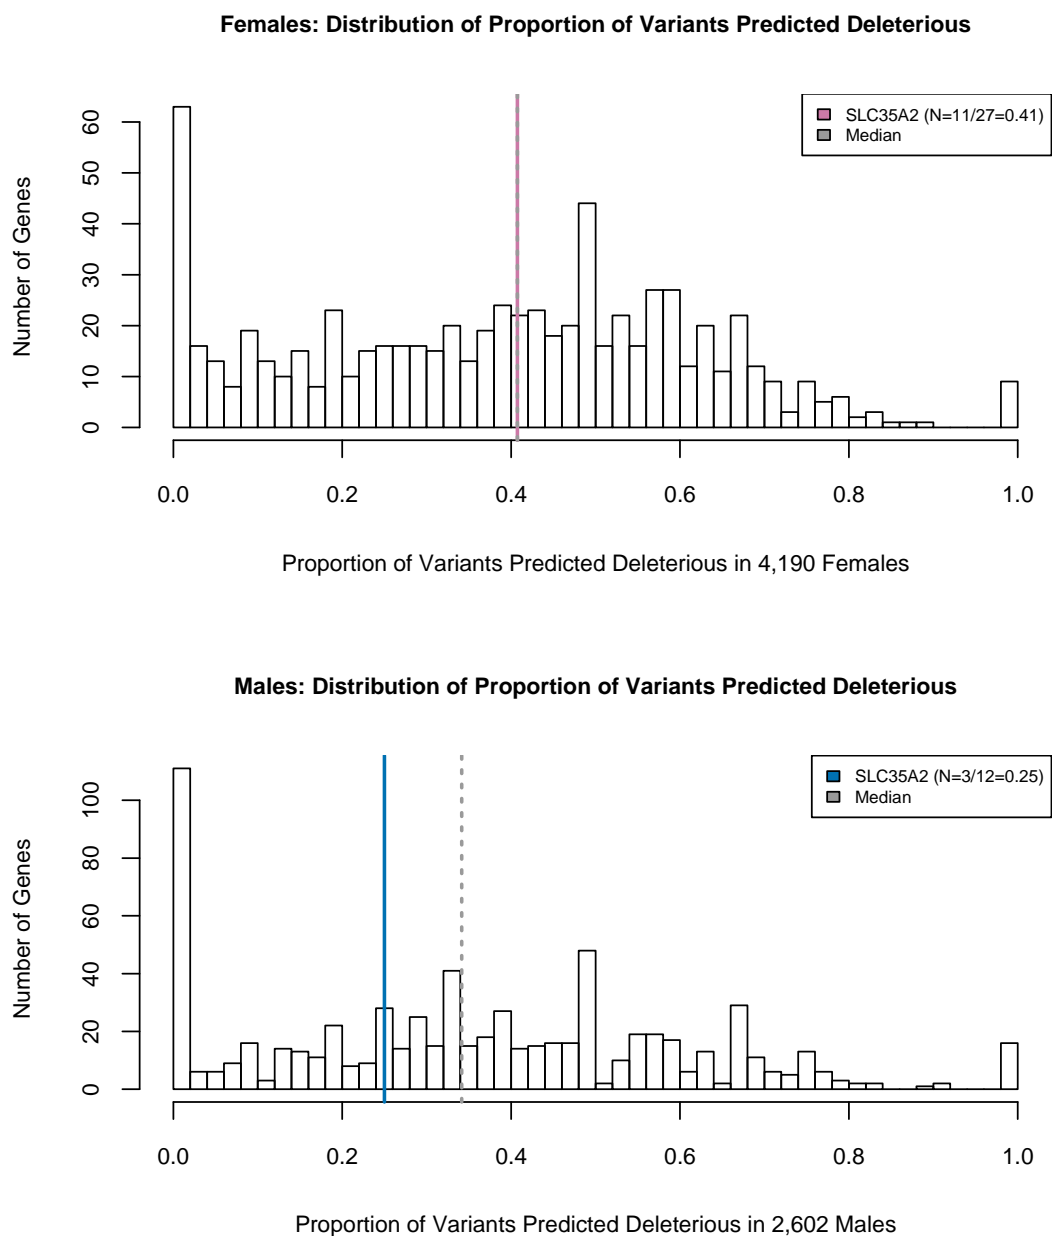

Figure S2. Population-Level Analysis of Putatively Deleterious *SLC35A2* Variants in ESP

The proportion of *SLC35A2* alleles predicted to be functionally deleterious was higher in females (0.41) compared to males (0.25) and the *SLC35A2* alleles observed in males (mean GERP 2.08) were less conserved than in females (mean GERP 2.90). A greater tolerance for deleterious *SLC35A2* alleles in females versus males is also supported by the observation that compared to all X chromosome genes, *SLC35A2* is ranked in the lowest ~1/3 of genes in males for proportion of alleles that are deleterious while *SLC35A2* is ranked in the 50th percentile in females.

| Glycan Structure                                                                  | Glycan Annotation  | Reference Value (Low-High) | CDG-341 | CDG-348 | CDG-352 |
|-----------------------------------------------------------------------------------|--------------------|----------------------------|---------|---------|---------|
| 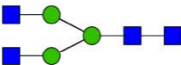 | Hex3HexNAc4        | 0.00 – 0.22                | 3.28    | 8.16    | 0.79    |
|  | Neu5Ac1Hex4HexNAc4 | 0.40 – 1.28                | 4.86    | 3.91    | 2.59    |

Figure S3. Presence of Galactose-Deficient Glycans in Serum Glycoproteins

N-glycans from whole serum glycoproteins were analyzed by MALDI-TOF and shows accumulation of both agalactosylated and monogalactosylated glycans. Reference values are based on the percentage that glycan constitutes of the total glycan pool. Sera samples for 341 and 348 were taken before the age of 1. Sample 352 was taken at 5 years of age, when his Tf profile was nearly normal.

CDG-348

Age 7 Months

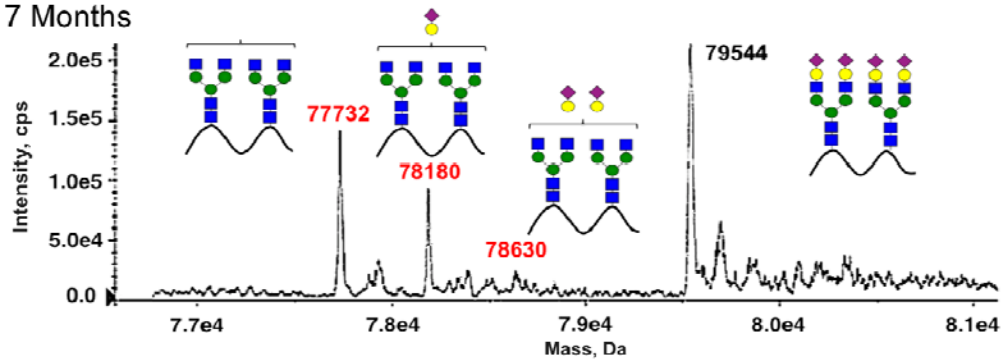

CDG-348

Age 33 Months

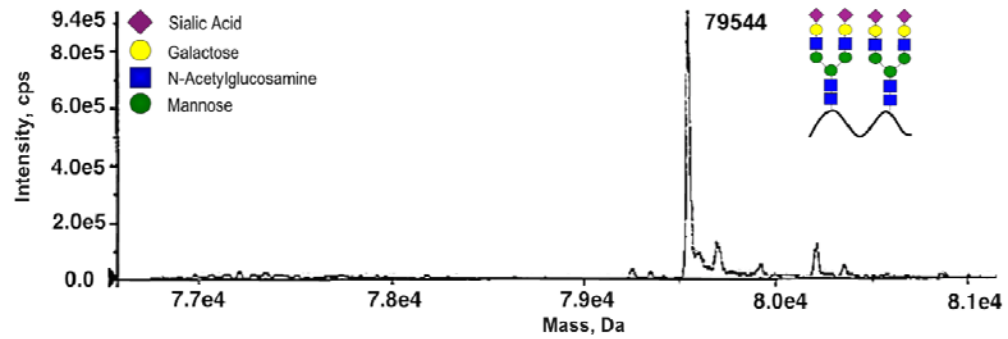

Figure S4. Improved Glycosylated Transferrin

Analysis of serum transferrin from affected individual CDG-348 showing age-dependent correction of the galactosylation deficiency.
